# Supplementary material
Source: Springer Nature journal article supplement (https://www.springermedizin.de/resource/supplementary/13045_2012_205_MOESM1_ESM.pdf/9660998)

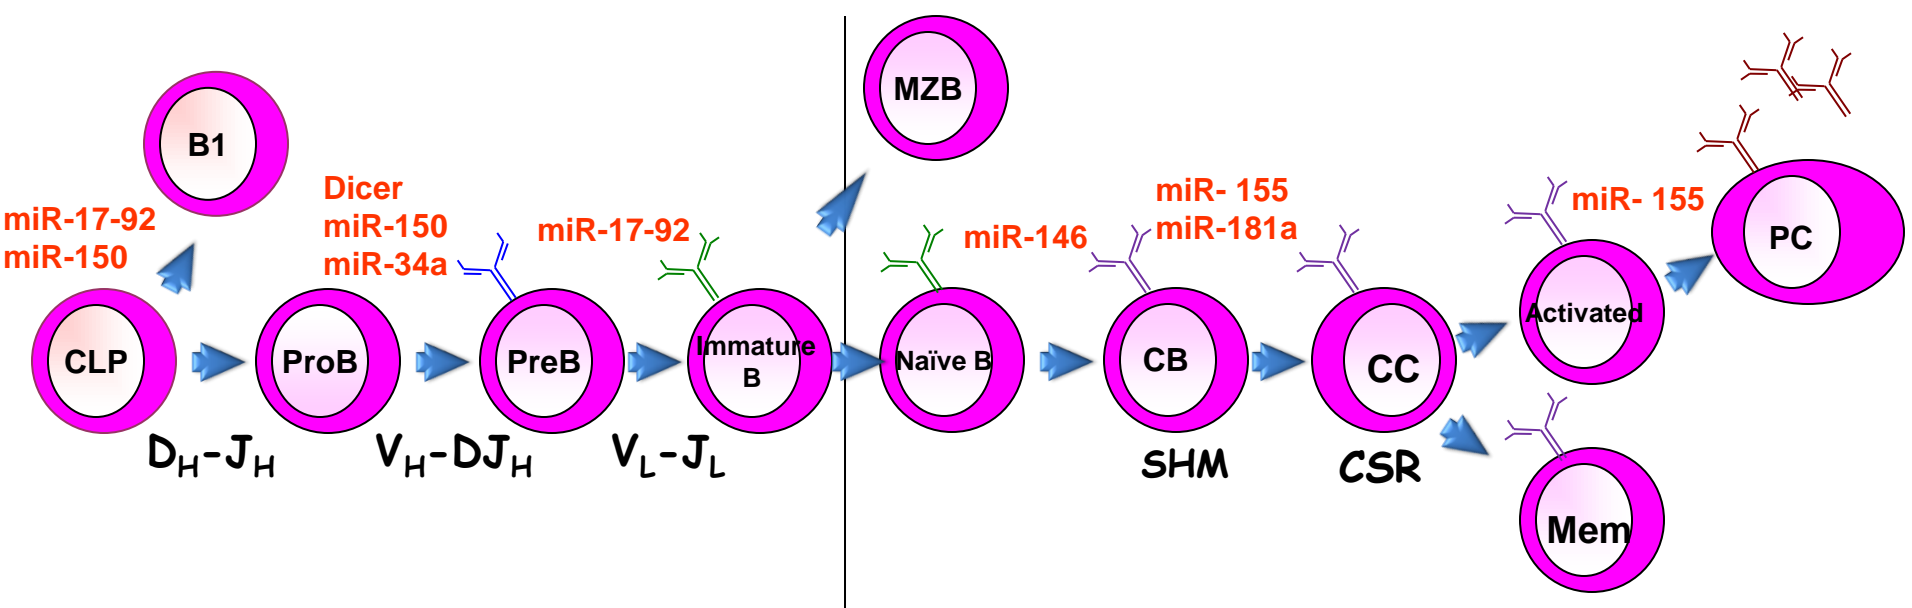

B-cell development in the Bone marrow

B-cell development in peripheral lymphoid tissues

Supplement: MOESM1 [file 9660998]
